# Supplementary material for: Metabolite Profile Characterization of Cyanobacterial Strains with Bioactivity on Lipid Metabolism Using In Vivo and In Vitro Approaches
Source: MDPI journal article supplement (doi:10.3390/md21090498), 2023-09-19
Supplement: s1 [file s1]

## Supplementary Material

**Table S1:** Library of Screening Fractions. Each strain was extracted using three different solvents (A-Hexane; B-Ethyl Acetate; C-Methanol), creating three chemical fractions per strain. All the fractions were stored in DMSO at a concentration of 10 mg/mL.

| LEGE CODE  | Strain                            | Origin      | Chemical Fraction | Library Number |
|------------|-----------------------------------|-------------|-------------------|----------------|
| LEGE 06077 | <i>Nostoc cf. edaphicum</i>       | Fresh Water | A                 | 1              |
|            |                                   |             | B                 | 2              |
|            |                                   |             | C                 | 3              |
| LEGE 07299 | <i>Nostoc sp.</i>                 | Fresh Water | A                 | 4              |
|            |                                   |             | B                 | 5              |
|            |                                   |             | C                 | 6              |
| LEGE 06158 | <i>Nostoc sp.</i>                 | Marine      | A                 | 7              |
|            |                                   |             | B                 | 8              |
|            |                                   |             | C                 | 9              |
| LEGE 07365 | <i>Nostoc sp.</i>                 | Fresh Water | A                 | 10             |
|            |                                   |             | B                 | 11             |
|            |                                   |             | C                 | 12             |
| LEGE 13413 | <i>Nostoc sp.</i>                 | Marine      | A                 | 13             |
|            |                                   |             | B                 | 14             |
|            |                                   |             | C                 | 15             |
| LEGE 03282 | <i>Cuspidothrix issatschenkoi</i> | Fresh Water | A                 | 16             |
|            |                                   |             | B                 | 17             |
|            |                                   |             | C                 | 18             |
| LEGE 03285 | <i>Cuspidothrix issatschenkoi</i> | Fresh Water | A                 | 19             |
|            |                                   |             | B                 | 20             |
|            |                                   |             | C                 | 21             |
| LEGE 00234 | <i>Dolichospermum sp.</i>         | Fresh Water | A                 | 22             |
|            |                                   |             | B                 | 23             |
|            |                                   |             | C                 | 24             |
| LEGE 04288 | <i>Nodularia sp.</i>              | Fresh Water | A                 | 25             |
|            |                                   |             | B                 | 26             |
|            |                                   |             | C                 | 27             |
| LEGE 06071 | <i>Nodularia sp.</i>              | Marine      | A                 | 28             |
|            |                                   |             | B                 | 29             |
|            |                                   |             | C                 | 30             |
| LEGE 06188 | <i>Calenema singularis</i>        | Marine      | A                 | 31             |
|            |                                   |             | B                 | 32             |
|            |                                   |             | C                 | 33             |
| LEGE 06123 | <i>Gloeocapsopsis crepidinum</i>  | Marine      | A                 | 34             |
|            |                                   |             | B                 | 35             |
|            |                                   |             | C                 | 36             |
| LEGE 13421 | <i>Gloeocapsopsis sp.</i>         | Marine      | A                 | 37             |
|            |                                   |             | B                 | 38             |
|            |                                   |             | C                 | 39             |

|               |                                         |        |   |    |
|---------------|-----------------------------------------|--------|---|----|
| LEGE<br>06111 | <i>Calothrix sp.</i>                    | Marine | A | 40 |
|               |                                         |        | B | 41 |
|               |                                         |        | C | 42 |
| LEGE<br>06122 | <i>Calothrix sp.</i>                    | Marine | A | 43 |
|               |                                         |        | B | 44 |
|               |                                         |        | C | 45 |
| LEGE<br>06105 | <i>Plectonema cf. radiosum</i>          | Marine | A | 46 |
|               |                                         |        | B | 47 |
|               |                                         |        | C | 48 |
| LEGE<br>06114 | <i>Plectonema cf. radiosum</i>          | Marine | A | 49 |
|               |                                         |        | B | 50 |
|               |                                         |        | C | 51 |
| LEGE<br>07159 | <i>Rivularia sp.</i>                    | Marine | A | 52 |
|               |                                         |        | B | 53 |
|               |                                         |        | C | 54 |
| LEGE<br>06147 | <i>unidentified Pleurocapsales</i>      | Marine | A | 55 |
|               |                                         |        | B | 56 |
|               |                                         |        | C | 57 |
| LEGE<br>10410 | <i>unidentified Pleurocapsales</i>      | Marine | A | 58 |
|               |                                         |        | B | 59 |
|               |                                         |        | C | 60 |
| LEGE<br>11391 | <i>Geitlerinema sp.</i>                 | Marine | A | 61 |
|               |                                         |        | B | 62 |
|               |                                         |        | C | 63 |
| LEGE<br>11393 | <i>Geitlerinema sp.</i>                 | Marine | A | 64 |
|               |                                         |        | B | 65 |
|               |                                         |        | C | 66 |
| LEGE<br>07176 | <i>Jaaginema litorale</i>               | Marine | A | 67 |
|               |                                         |        | B | 68 |
|               |                                         |        | C | 69 |
| LEGE<br>06100 | <i>Lusitaniella coriacea</i>            | Marine | A | 70 |
|               |                                         |        | B | 71 |
|               |                                         |        | C | 72 |
| LEGE<br>06101 | <i>Nodosilinea nodulosa</i>             | Marine | A | 73 |
|               |                                         |        | B | 74 |
|               |                                         |        | C | 75 |
| LEGE<br>07164 | <i>Schizothrix aff. septentrionalis</i> | Marine | A | 76 |
|               |                                         |        | B | 77 |
|               |                                         |        | C | 78 |
| LEGE<br>06141 | <i>cf. Oculatella sp.</i>               | Marine | A | 79 |
|               |                                         |        | B | 80 |
|               |                                         |        | C | 81 |
| LEGE<br>10370 | <i>cf. Phormidesmis sp.</i>             | Marine | A | 82 |
|               |                                         |        | B | 83 |
|               |                                         |        | C | 84 |
| LEGE<br>06003 | <i>cf. Romeria sp.</i>                  | Marine | A | 85 |
|               |                                         |        | B | 86 |
|               |                                         |        | C | 87 |
| LEGE<br>06208 | <i>Tychonema sp.</i>                    | Marine | A | 88 |
|               |                                         |        | B | 89 |
|               |                                         |        | C | 90 |

|               |                                   |             |   |     |
|---------------|-----------------------------------|-------------|---|-----|
| LEGE<br>00036 | <i>Synechocystis salina</i>       | Marine      | A | 91  |
|               |                                   |             | B | 92  |
|               |                                   |             | C | 93  |
| LEGE<br>00037 | <i>Synechocystis salina</i>       | Marine      | A | 94  |
|               |                                   |             | B | 95  |
|               |                                   |             | C | 96  |
| LEGE<br>06106 | unidentified <i>Nostocales</i>    | Marine      | A | 97  |
|               |                                   |             | B | 98  |
|               |                                   |             | C | 99  |
| LEGE<br>12447 | <i>Geminobacterium atlanticum</i> | Fresh Water | A | 100 |
|               |                                   |             | B | 101 |
|               |                                   |             | C | 102 |
| LEGE<br>07459 | <i>Myxosarcina sp.</i>            | Marine      | A | 103 |
|               |                                   |             | B | 104 |
|               |                                   |             | C | 105 |
| LEGE<br>06146 | <i>Nostoc sp.</i>                 | Marine      | A | 106 |
|               |                                   |             | B | 107 |
|               |                                   |             | C | 108 |
| LEGE<br>03284 | <i>Cuspidothrix issatschenkoi</i> | Fresh Water | A | 109 |
|               |                                   |             | B | 110 |
|               |                                   |             | C | 111 |
| LEGE<br>00248 | <i>Dolichospermum sp.</i>         | Fresh Water | A | 112 |
|               |                                   |             | B | 113 |
|               |                                   |             | C | 114 |
| LEGE<br>00263 | <i>Dolichospermum sp.</i>         | Fresh Water | A | 115 |
|               |                                   |             | B | 116 |
|               |                                   |             | C | 117 |

**Table S2:** List of qPCR primers used in bioactivity screening.

| Gene          | Forward primer (5'-3')  | Reverse primer (5'-3') |
|---------------|-------------------------|------------------------|
| <i>UCP1</i>   | AGCCATCTGCATGGGATCAAA   | GGGTCGTCCCTTTCCAAAGTG  |
| PPAR $\gamma$ | CCCTGGCAAAGCATTTGTAT    | GAAACTGGCACCCCTTGAAAA  |
| TBP           | ACCCTTCACCAATGACTCCTATG | TGACTGCAGCAAATCGCTTGG  |

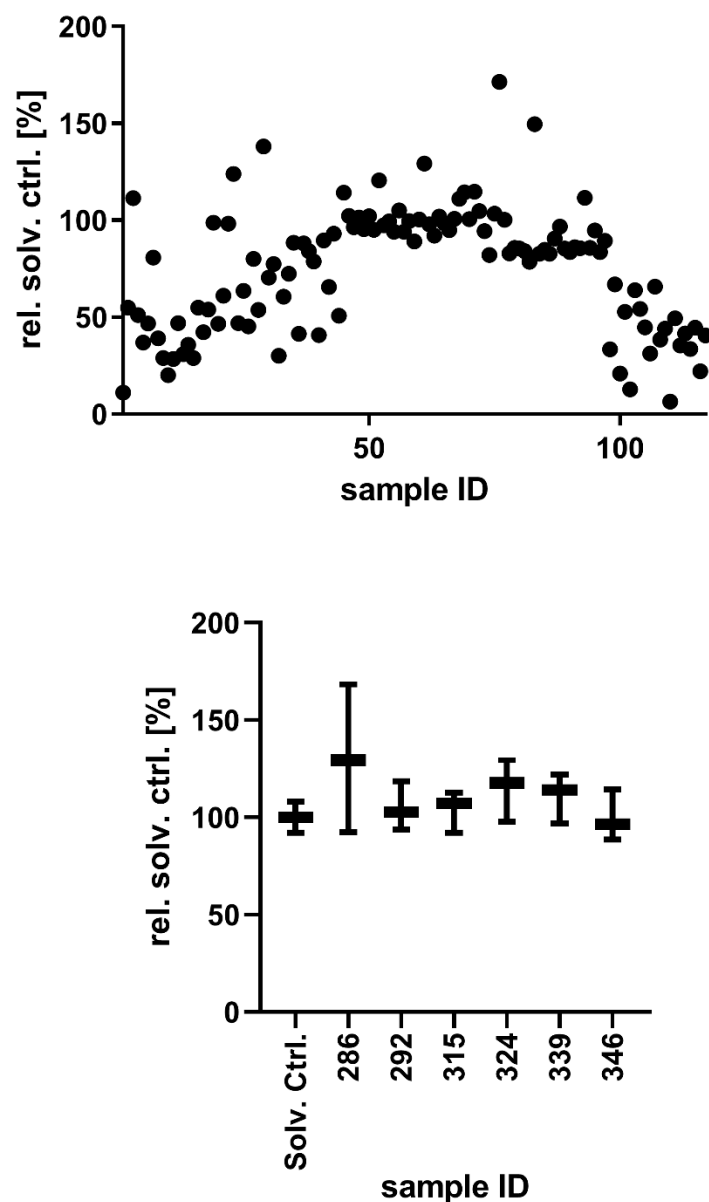

**Figure S1:** Bioactivity Screening, on the glucose uptake, using HepG2 cell line (top) and bioactivity confirmation of the positive hits (bottom). Data is presented as MFI relative to solvent control (0.5% DMSO) for both graphs. Briefly, 24 hours after seeding, cells were placed under starvation in HBSS for 16 hours. Afterwards, cells were exposed to the fractions and controls for 2 hours followed by 1 hour with 100  $\mu$ M 2-NBDG. Cells were washed and fluorescence read.

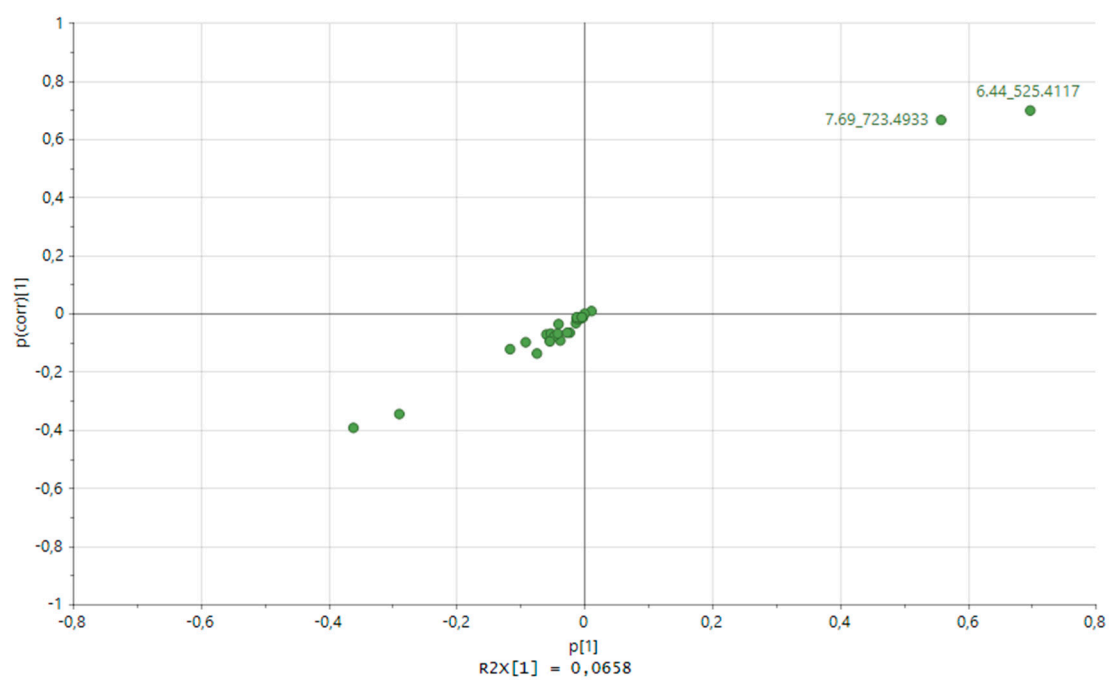

**Figure S2:** S-plot for fraction C, highlighting 2 potential biomarkers from fraction C with regards to Zf-NR bioactivity.
